# Supplementary material for: An unusual three-dimensional coordination network formed by parallel polythreading of two-fold polycatenated (6,3) layers
Source: Royal Society of Chemistry journal article supplement (doi:10.1039/c2ce25113b), 2012-01-01
Supplement: c2ce25113b.pdf [file c2ce25113b.pdf]

# Supporting Materials

## **An unusual three-dimensional coordination network formed by parallel polythreaded of two-fold polycatenated (6,3) layers**

**Yan-Feng Cui, Qian Chen, Peng-Peng Sun, Bao-Long Li\* and Hai-Yan Li**

*Key Laboratory of Organic Synthesis of Jiangsu Province, College of Chemistry, Chemical Engineering and Materials Science, Soochow University, Suzhou 215123, P. R. China*

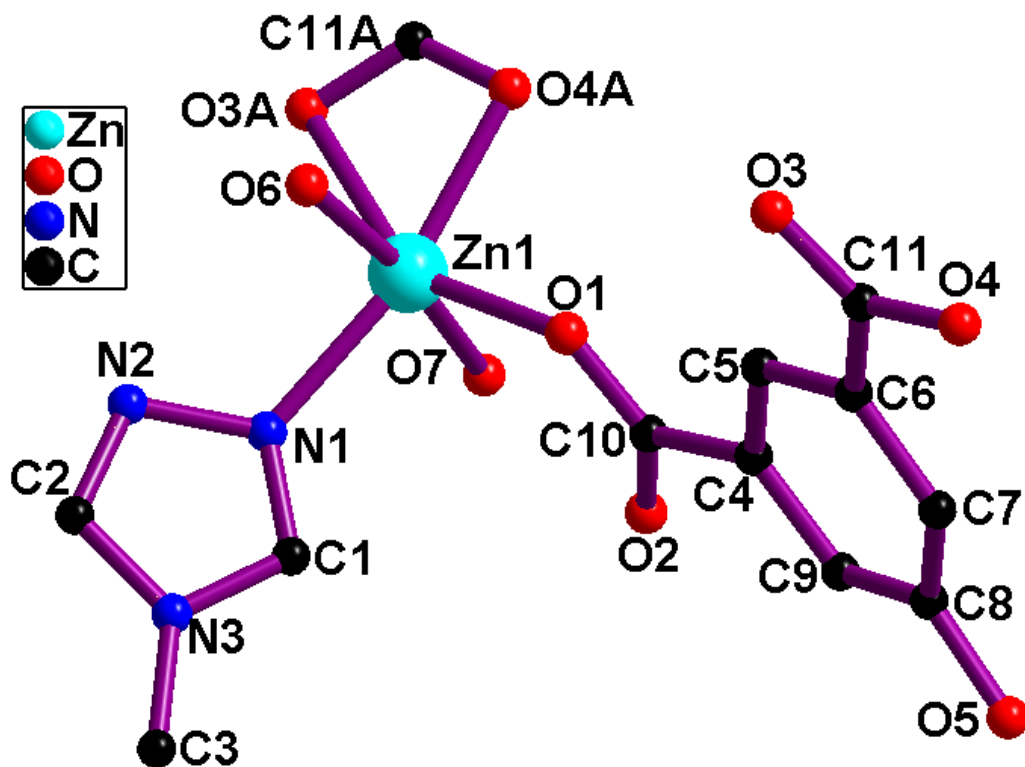

Fig. S1. The coordination environment of the Zn(II) atom in **1**.

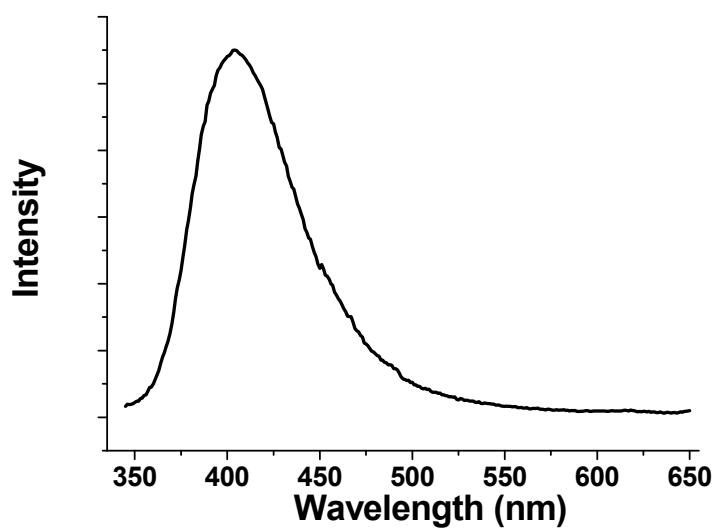

Fig. S2. Solid-state photoluminescent spectra of **1** at room temperature.
